# Supplementary material for: Single-cell expression noise and gene-body methylation in Arabidopsis thaliana
Source: PubMed Central journal article supplement (PMC6781109; doi:10.1038/s41437-018-0181-z), 2019-01-16
Supplement: 41437_2018_181_MOESM1_ESM.pdf [file 41437_2018_181_MOESM1_ESM.pdf]

## Supplementary Material

### Single cell expression noise and gene-body methylation in

### *Arabidopsis thaliana*

Robert Horvath<sup>1</sup>, Benjamin Laenen<sup>1</sup>, Shohei Takuno<sup>2</sup>, Tanja Slotte<sup>1</sup>

<sup>1</sup>Department of Ecology, Environment and Plant Sciences, Science for Life laboratory, Stockholm University, SE-106 91 Stockholm, Sweden

<sup>2</sup>Department of Evolutionary Studies of Biosystems, SOKENDAI (The Graduate University for Advanced Studies), Hayama, Kanagawa, Japan

\*Corresponding authors:

Robert Horvath: robert.horvath@su.se

Tanja Slotte: Tanja.Slotte@su.se

## Supplementary tables

**Table S1.** Observed correlations of  $F^*$ ,  $F'$  as well as the expression consistency and various genomic features based on a two-sided Spearman' rank-order correlation test and a two-sided Mann-Whitney U-test for binary variables.  $P$ -value were corrected for multiple testing using a Benjamini and Hochberg  $p$ -value adjustment.

| Genetic features                                    | Estimated stochastic gene expression $F^*$ |                | Estimated transcriptional noise $F'$ |                 | Gene expression consistency |                |
|-----------------------------------------------------|--------------------------------------------|----------------|--------------------------------------|-----------------|-----------------------------|----------------|
|                                                     | $\rho$ or median difference                | $p$ -value     | $\rho$ or median difference          | $p$ -value      | $\rho$ or median difference | $p$ -value     |
| Mean expression level                               | 0.02126263                                 | 0.066          | -0.3078724                           | $< 2*10^{-16}$  | 0.7157376                   | $< 2*10^{-16}$ |
| Gene length                                         | -0.1401393                                 | $< 2*10^{-16}$ | -0.1167594                           | $< 2*10^{-16}$  | 0.1825358                   | $< 2*10^{-16}$ |
| Lethal gene                                         | -0.044                                     | 0.24           | -0.029                               | 0.082           | 1                           | 0.23           |
| <i>A. lyrata</i> homolog $Ka/Ks$                    | 0.06814572                                 | $1.54*10^{-7}$ | 0.1244503                            | $< 2*10^{-16}$  | -0.1591528                  | $< 2*10^{-16}$ |
| Co-expression module size                           | -0.05019564                                | $1.57*10^{-5}$ | -0.04837808                          | $2.74*10^{-5}$  | 0.02263742                  | 0.058          |
| Expression breadth                                  | -0.1380663                                 | $< 2*10^{-16}$ | -0.2085376                           | $< 2*10^{-16}$  | 0.244334                    | $< 2*10^{-16}$ |
| Gene duplicates retained from the $\alpha$ WGD      | -0.081                                     | $2.89*10^{-6}$ | -0.121                               | $8.69*10^{-12}$ | 2                           | $7.2*10^{-15}$ |
| Gene duplicates retained from the $\beta\gamma$ WGD | -0.007                                     | 0.37           | -0.018                               | 0.097           | 2                           | 0.0013         |
| Tandem duplicated genes                             | 0.022                                      | 0.72           | 0.006                                | 0.24            | 0                           | 0.85           |

**Table S2.** Model averaged ANCOVA of  $F^*$  as well as  $F'$  with all genomic features studied ( $R^2=0.0199$  and  $R^2=0.0925$ , respectively;  $n=5\ 637$ ). Genomic features which were kept in the best model generated by a BIC model averaging model selection are indicated in the last column.

| Genetic features                                    | Estimated stochastic gene expression $F^*$ |                         |         |                |                              |                        | Genetic features                                    | Estimated transcriptional noise $F'$ |                         |         |                |                              |                        |
|-----------------------------------------------------|--------------------------------------------|-------------------------|---------|----------------|------------------------------|------------------------|-----------------------------------------------------|--------------------------------------|-------------------------|---------|----------------|------------------------------|------------------------|
|                                                     | Coefficients                               | Adjusted Standard error | Z value | $\Pr(> z )$    | Relative variable importance | Included in best model |                                                     | Coefficients                         | Adjusted Standard error | Z value | $\Pr(> z )$    | Relative variable importance | Included in best model |
| Mean expression level                               | -2.344e-04                                 | 2.063e-03               | 0.114   | 0.910          | 0.02                         | No                     | Log (mean expression level)                         | -0.2533399                           | 0.0125023               | 20.26   | $< 2*10^{-16}$ | 1.00                         | Yes                    |
| Log (gene length)                                   | -8.315e-02                                 | 9.268e-03               | 8.972   | $< 2*10^{-16}$ | 1.00                         | Yes                    | Log (gene length)                                   | -0.1189630                           | 0.0128415               | 9.264   | $< 2*10^{-16}$ | 1.00                         | Yes                    |
| gbM                                                 | -9.619e-05                                 | 2.864e-03               | 0.034   | 0.973          | 0.01                         | No                     | gbM                                                 | -0.0004216                           | 0.0052589               | 0.080   | 0.936          | 0.02                         | No                     |
| Lethal gene                                         | -4.820e-05                                 | 2.885e-03               | 0.017   | 0.987          | 0.01                         | No                     | Lethal gene                                         | -0.0002072                           | 0.0044945               | 0.046   | 0.963          | 0.01                         | No                     |
| <i>A. lyrata</i> homolog $Ka/Ks$                    | 1.200e-03                                  | 5.041e-03               | 0.238   | 0.812          | 0.07                         | No                     | <i>A. lyrata</i> homolog $Ka/Ks$                    | 0.0101158                            | 0.0168964               | 0.599   | 0.549          | 0.30                         | No                     |
| Co-expression module size                           | -4.920e-04                                 | 3.122e-03               | 0.158   | 0.875          | 0.04                         | No                     | Co-expression module size                           | -0.0100867                           | 0.0169814               | 0.594   | 0.553          | 0.30                         | No                     |
| Expression breadth                                  | -6.338e-02                                 | 9.247e-03               | 6.854   | $< 2*10^{-16}$ | 1.00                         | Yes                    | Expression breadth                                  | -0.1165587                           | 0.0127784               | 9.122   | $< 2*10^{-16}$ | 1.00                         | Yes                    |
| Gene duplicates retained from the $\alpha$ WGD      | -9.190e-02                                 | 2.030e-02               | 4.527   | $< 2*10^{-16}$ | 1.00                         | Yes                    | Gene duplicates retained from the $\alpha$ WGD      | -0.1242538                           | 0.0270938               | 4.586   | $4.5*10^{-6}$  | 1.00                         | Yes                    |
| Gene duplicates retained from the $\beta\gamma$ WGD | 7.494e-05                                  | 3.284e-03               | 0.023   | 0.982          | 0.01                         | No                     | Gene duplicates retained from the $\beta\gamma$ WGD | 0.0001605                            | 0.0045869               | 0.035   | 0.972          | 0.01                         | No                     |
| Tandem duplicated genes                             | -1.728e-05                                 | 4.079e-03               | 0.004   | 0.997          | 0.01                         | No                     | Tandem duplicated genes                             | 0.0001026                            | 0.0055777               | 0.018   | 0.985          | 0.01                         | No                     |

**Table S3.** Best ANCOVA model of F\* as well as F' based on a BIC model averaging model selection ( $R^2=0.0261$  and  $R^2=0.1016$ , respectively; n=5637).

| Genetic features                               | Estimated stochastic gene expression F* |                |         |                | Genetic features                               | Estimated transcriptional noise F' |                |         |                |
|------------------------------------------------|-----------------------------------------|----------------|---------|----------------|------------------------------------------------|------------------------------------|----------------|---------|----------------|
|                                                | Coefficients                            | Sum of squares | F value | Pr(>F)         |                                                | Coefficients                       | Sum of squares | F value | Pr(>F)         |
| Log (gene length)                              | -0.08327113                             | 38.69          | 81.875  | $< 2*10^{-16}$ | Log (gene length)                              | -0.2537922                         | 352.6          | 423.933 | $< 2*10^{-16}$ |
| Expression breadth                             | -0.06364979                             | 22.66          | 47.961  | $4.8*10^{-12}$ | Log (mean expression level)                    | -0.1210657                         | 80.4           | 96.698  | $< 2*10^{-16}$ |
| Gene duplicates retained from the $\alpha$ WGD | -0.09210845                             | 10.12          | 21.415  | $3.8*10^{-6}$  | Expression breadth                             | -0.1192002                         | 78.6           | 94.526  | $< 2*10^{-16}$ |
|                                                |                                         |                |         |                | Gene duplicates retained from the $\alpha$ WGD | -0.1234328                         | 18.1           | 21.779  | $3.1*10^{-6}$  |

**Table S4.** Model averaged ANCOVA of  $F^*$  as well as  $F'$  only including genomic features for which information was available for all genes ( $R^2=0.0153$  and  $R^2=0.0972$ , respectively;  $n=8\ 975$ ). Genomic features which were kept in the best model generated by a BIC model averaging model selection are indicated in the last column.

| Genetic features                                    | Estimated stochastic gene expression $F^*$ |                         |         |                |                              |                        | Genetic features                                    | Estimated transcriptional noise $F'$ |                         |         |                |                              |                        |
|-----------------------------------------------------|--------------------------------------------|-------------------------|---------|----------------|------------------------------|------------------------|-----------------------------------------------------|--------------------------------------|-------------------------|---------|----------------|------------------------------|------------------------|
|                                                     | Coefficients                               | Adjusted Standard error | Z value | Pr(> z )       | Relative variable importance | Included in best model |                                                     | Coefficients                         | Adjusted Standard error | Z value | Pr(> z )       | Relative variable importance | Included in best model |
| Mean expression level                               | -1.492e-04                                 | 1.464e-03               | 0.102   | 0.919          | 0.02                         | No                     | Log (mean expression level)                         | -0.2758927                           | 0.0097403               | 28.33   | $< 2*10^{-16}$ | 1.00                         | Yes                    |
| Log (gene length)                                   | -1.005e-01                                 | 7.319e-03               | 13.74   | $< 2*10^{-16}$ | 1.00                         | Yes                    | Log (gene length)                                   | -0.1478755                           | 0.0117618               | 12.57   | $< 2*10^{-16}$ | 1.00                         | Yes                    |
| gbM                                                 | -3.890e-04                                 | 3.774e-03               | 0.103   | 0.918          | 0.02                         | No                     | gbM                                                 | -0.0083983                           | 0.0224336               | 0.374   | 0.708          | 0.15                         | No                     |
| Lethal gene                                         | -2.473e-04                                 | 3.138e-03               | 0.079   | 0.937          | 0.01                         | No                     | Lethal gene                                         | -0.0027356                           | 0.0128541               | 0.213   | 0.831          | 0.06                         | No                     |
| Gene duplicates retained from the $\alpha$ WGD      | -8.505e-02                                 | 1.574e-02               | 5.402   | $1*10^{-7}$    | 1.00                         | Yes                    | Gene duplicates retained from the $\alpha$ WGD      | -0.1148445                           | 0.0212088               | 5.415   | $1*10^{-7}$    | 1.00                         | Yes                    |
| Gene duplicates retained from the $\beta\gamma$ WGD | -1.225e-04                                 | 2.657e-03               | 0.046   | 0.963          | 0.01                         | No                     | Gene duplicates retained from the $\beta\gamma$ WGD | -0.0002369                           | 0.0039510               | 0.060   | 0.952          | 0.01                         | No                     |
| Tandem duplicated genes                             | 6.005e-05                                  | 2.679e-03               | 0.022   | 0.982          | 0.01                         | No                     | Tandem duplicated genes                             | 0.0005671                            | 0.0061605               | 0.092   | 0.927          | 0.02                         | No                     |

**Table S5.** Linear regression model including gbM and a set of orthogonal predictor variables generated by a PCR analyses including gene length, gene expression breadth and gene duplicates retained from the  $\alpha$  WGD as well as mean expression level in the case of F' to predict gene expression noise (F\* and F'). [The loadings of each genomic feature on the orthogonal predictor variables are shown in the supplementary Fig. S2 and S3.](#)

| Predictors | Estimated stochastic gene expression F* |                |                 | Predictors | Estimated transcriptional noise F' |                |                 |
|------------|-----------------------------------------|----------------|-----------------|------------|------------------------------------|----------------|-----------------|
|            | Estimate                                | Standard Error | <i>p</i> -value |            | Estimate                           | Standard Error | <i>p</i> -value |
| Intercept  | 1.199849                                | 0.013678       | $< 2*10^{-16}$  | Intercept  | 3.07124                            | 0.01817        | $< 2*10^{-16}$  |
| PC 1       | -0.077306                               | 0.010311       | $7.52*10^{-14}$ | PC 1       | 0.11887                            | 0.01292        | $< 2*10^{-16}$  |
| PC 2       | 0.072764                                | 0.009221       | $3.58*10^{-15}$ | PC 2       | -0.23562                           | 0.01245        | $< 2*10^{-16}$  |
| PC 3       | 0.033624                                | 0.010533       | 0.00142         | PC 3       | 0.02942                            | 0.01283        | 0.0219          |
|            |                                         |                |                 | PC 4       | -0.15561                           | 0.01418        | $< 2*10^{-16}$  |
| gbM        | -0.007193                               | 0.023379       | 0.75834         | gbM        | -0.02715                           | 0.03108        | 0.3824          |

**Table S6.** Model averaged ANCOVA of F\* as well as F' with all genomic features studied using only genes identified as gbM or unmethylated in the two independent studies, Bewick et al. 2016 and Seymour et al. 2014 (R<sup>2</sup>=0.0175 and R<sup>2</sup>=0.0909, respectively; n=5 064). Genomic features which were kept in the best model generated by a BIC model averaging model selection are indicated in the last column.

| Genetic features                                    | Estimated stochastic gene expression F* |                         |         |                       |                              |                        | Genetic features                                    | Estimated transcriptional noise F' |                         |         |                       |                              |                        |
|-----------------------------------------------------|-----------------------------------------|-------------------------|---------|-----------------------|------------------------------|------------------------|-----------------------------------------------------|------------------------------------|-------------------------|---------|-----------------------|------------------------------|------------------------|
|                                                     | Coefficients                            | Adjusted Standard error | Z value | Pr(> z )              | Relative variable importance | Included in best model |                                                     | Coefficients                       | Adjusted Standard error | Z value | Pr(> z )              | Relative variable importance | Included in best model |
| Mean expression level                               | -2.148e-04                              | 2.031e-03               | 0.106   | 0.9158                | 0.02                         | No                     | Log (mean expression level)                         | -0.2550540                         | 0.0131291               | 19.43   | < 2*10 <sup>-16</sup> | 1.00                         | Yes                    |
| Log (gene length)                                   | -7.832e-05                              | 9.820e-03               | 7.976   | < 2*10 <sup>-16</sup> | 1.00                         | Yes                    | Log (gene length)                                   | -0.1148675                         | 0.0132932               | 8.641   | < 2*10 <sup>-16</sup> | 1.00                         | Yes                    |
| gbM                                                 | -7.830e-05                              | 3.085e-03               | 0.025   | 0.9798                | 0.01                         | No                     | gbM                                                 | -0.0005852                         | 0.0062898               | 0.093   | 0.9259                | 0.02                         | No                     |
| Lethal gene                                         | 6.499e-04                               | 5.956e-03               | 0.109   | 0.9131                | 0.02                         | No                     | Lethal gene                                         | 0.0003096                          | 0.0052965               | 0.058   | 0.9534                | 0.02                         | No                     |
| <i>A. lyrata</i> homolog <i>Ka/Ks</i>               | 4.465e-04                               | 3.009e-03               | 0.148   | 0.8820                | 0.03                         | No                     | <i>A. lyrata</i> homolog <i>Ka/Ks</i>               | 0.0020687                          | 0.0079220               | 0.261   | 0.7940                | 0.08                         | No                     |
| Co-expression module size                           | -9.752e-05                              | 1.506e-03               | 0.065   | 0.9484                | 0.02                         | No                     | Co-expression module size                           | -0.0018415                         | 0.0074879               | 0.246   | 0.8057                | 0.07                         | No                     |
| Expression breadth                                  | -6.580e-02                              | 9.745e-03               | 6.752   | < 2*10 <sup>-16</sup> | 1.00                         | Yes                    | Expression breadth                                  | -0.1226301                         | 0.0130710               | 9.382   | < 2*10 <sup>-16</sup> | 1.00                         | Yes                    |
| Gene duplicates retained from the $\alpha$ WGD      | -5.682e-02                              | 3.418e-02               | 1.663   | 0.0964                | 0.80                         | Yes                    | Gene duplicates retained from the $\alpha$ WGD      | -0.0882174                         | 0.0414618               | 2.128   | 0.0334                | 0.88                         | Yes                    |
| Gene duplicates retained from the $\beta\gamma$ WGD | 4.637e-05                               | 3.541e-03               | 0.013   | 0.9896                | 0.01                         | No                     | Gene duplicates retained from the $\beta\gamma$ WGD | 0.0003340                          | 0.0056098               | 0.060   | 0.9525                | 0.02                         | No                     |
| Tandem duplicated genes                             | 1.118e-04                               | 4.557e-03               | 0.025   | 0.9804                | 0.01                         | No                     | Tandem duplicated genes                             | 0.0002254                          | 0.0062822               | 0.036   | 0.9714                | 0.01                         | No                     |

**Table S7.** Model averaged ANCOVA of gene expression consistency ( $R^2=0.546$ ;  $n=5\ 637$ ). Genomic features which were kept in the best model generated by a BIC model averaging model selection are indicated in the last column.

| Genomic features                                    | Gene expression consistency |                         |         |                       |                              |                        |
|-----------------------------------------------------|-----------------------------|-------------------------|---------|-----------------------|------------------------------|------------------------|
|                                                     | Coefficients                | Adjusted Standard error | Z value | Pr(> z )              | Relative variable importance | Included in best model |
| Log (mean expression level)                         | 4.219                       | 5.384e-02               | 78.364  | < 2*10 <sup>-16</sup> | 1.00                         | Yes                    |
| Log (gene length)                                   | 1.406                       | 8.233e-02               | 17.074  | < 2*10 <sup>-16</sup> | 1.00                         | Yes                    |
| gbM                                                 | 2.946e-01                   | 2.336e-01               | 1.261   | 0.207                 | 0.67                         | Yes                    |
| Lethal gene                                         | -1.802e-03                  | 2.402e-02               | 0.075   | 0.940                 | 0.02                         | No                     |
| A. lyrata homolog Ka/Ks                             | -3.349e-02                  | 6.519e-02               | 0.514   | 0.607                 | 0.24                         | No                     |
| Co-expression module size                           | 7.287e-02                   | 8.960e-02               | 0.813   | 0.416                 | 0.45                         | No                     |
| Expression breadth                                  | 5.269e-01                   | 5.509e-02               | 9.566   | < 2*10 <sup>-16</sup> | 1.00                         | Yes                    |
| Gene duplicates retained from the $\alpha$ WGD      | 5.190e-01                   | 1.180e-01               | 4.398   | 1.1*10 <sup>-5</sup>  | 1.00                         | Yes                    |
| Gene duplicates retained from the $\beta\gamma$ WGD | -6.796e-05                  | 1.847e-02               | 0.004   | 0.997                 | 0.01                         | No                     |
| Tandem duplicated genes                             | 1.589e-03                   | 2.823e-02               | 0.056   | 0.955                 | 0.02                         | No                     |



**Table S8.** Linear regression model including gbM and a set of orthogonal predictor variables generated by a PCR analyses including mean expression level, gene length, gene expression breadth and gene duplicates retained from the  $\alpha$  WGD to predict gene expression consistency. [The loadings of each genomic feature on the orthogonal predictor variables are shown in the supplementary Fig. S4.](#)

| Predictors | Log (intron FPKM) |                |                   |
|------------|-------------------|----------------|-------------------|
|            | Estimate          | Standard Error | <i>p</i> -value   |
| Intercept  | 12.06959          | 0.07807        | $< 2 * 10^{-16}$  |
| PC 1       | -1.96386          | 0.05552        | $< 2 * 10^{-16}$  |
| PC 2       | 2.55328           | 0.05352        | $< 2 * 10^{-16}$  |
| PC 3       | 0.34468           | 0.05516        | $4.43 * 10^{-10}$ |
| PC 4       | 3.09063           | 0.06095        | $< 2 * 10^{-16}$  |
| gbM        | 0.45663           | 0.13357        | 0.000633          |

**Table S9.** Model averaged ANCOVA of gene expression consistency using only genes identified as gbM or unmethylated in the two independent studies, Bewick et al. 2016 and Seymour et al. 2014 ( $R^2=0.549$ ;  $n=5\ 064$ ). Genomic features which were kept in the best model generated by a BIC model averaging model selection are indicated in the last column.

| Genomic features                                    | Gene expression consistency |                         |         |                |                              |                        |
|-----------------------------------------------------|-----------------------------|-------------------------|---------|----------------|------------------------------|------------------------|
|                                                     | Coefficients                | Adjusted Standard error | Z value | Pr(> z )       | Relative variable importance | Included in best model |
| Log (mean expression level)                         | 4.2545812                   | 0.0562651               | 75.617  | $< 2*10^{-16}$ | 1.00                         | Yes                    |
| Log (gene length)                                   | 1.3531769                   | 0.0798001               | 16.957  | $< 2*10^{-16}$ | 1.00                         | Yes                    |
| gbM                                                 | 0.5052635                   | 0.1940094               | 2.604   | 0.00921        | 0.93                         | Yes                    |
| Lethal gene                                         | -0.0033970                  | 0.0325469               | 0.104   | 0.91687        | 0.02                         | No                     |
| A. lyrata homolog Ka/Ks                             | -0.0153532                  | 0.0453320               | 0.339   | 0.73485        | 0.13                         | No                     |
| Co-expression module size                           | 0.0169273                   | 0.0488635               | 0.346   | 0.72903        | 0.13                         | No                     |
| Expression breadth                                  | 0.5375005                   | 0.0567918               | 9.464   | $< 2*10^{-16}$ | 1.00                         | Yes                    |
| Gene duplicates retained from the $\alpha$ WGD      | 0.4375515                   | 0.1524944               | 2.869   | 0.00411        | 0.95                         | Yes                    |
| Gene duplicates retained from the $\beta\gamma$ WGD | -0.0021089                  | 0.0272180               | 0.077   | 0.93824        | 0.02                         | No                     |
| Tandem duplicated genes                             | 0.0001359                   | 0.0251099               | 0.005   | 0.99568        | 0.01                         | No                     |

**Table S10.** Model averaged ANCOVA of log (intron FPKM) and various genomic features ( $R^2=0.728$ ;  $n=4\ 376$ ). Genomic features which were kept in the best model generated by a BIC model averaging model selection are indicated in the last column.

| Genomic features                                    | Log (intron FPKM) |                         |         |                |                              |                        |
|-----------------------------------------------------|-------------------|-------------------------|---------|----------------|------------------------------|------------------------|
|                                                     | Coefficients      | Adjusted Standard error | Z value | Pr(> z )       | Relative variable importance | Included in best model |
| Log (gene FPKM)                                     | 1.560             | 1.584e-02               | 98.488  | $< 2*10^{-16}$ | 1.00                         | Yes                    |
| Log (gene length)                                   | -8.398e-01        | 3.151e-02               | 26.650  | $< 2*10^{-16}$ | 1.00                         | Yes                    |
| Log (total intron length)                           | 4.618e-01         | 2.929e-02               | 15.767  | $< 2*10^{-16}$ | 1.00                         | Yes                    |
| Log (intron number)                                 | 8.906e-01         | 2.901e-02               | 30.705  | $< 2*10^{-16}$ | 1.00                         | Yes                    |
| gbM                                                 | -1.107e-01        | 6.132e-02               | 1.806   | 0.071          | 0.83                         | Yes                    |
| Lethal gene                                         | 6.777e-04         | 7.316e-03               | 0.093   | 0.926          | 0.02                         | No                     |
| A. lyrata homolog Ka/Ks                             | 4.367e-04         | 3.683e-03               | 0.119   | 0.906          | 0.03                         | No                     |
| Co-expression module size                           | 1.598e-04         | 2.491e-03               | 0.064   | 0.949          | 0.02                         | No                     |
| Expression breadth                                  | -8.594e-02        | 1.606e-02               | 5.350   | $1*10^{-7}$    | 1.00                         | Yes                    |
| Gene duplicates retained from the $\alpha$ WGD      | -4.469e-04        | 5.608e-03               | 0.080   | 0.936          | 0.02                         | No                     |
| Gene duplicates retained from the $\beta\gamma$ WGD | 9.661e-05         | 5.813e-03               | 0.017   | 0.987          | 0.02                         | No                     |
| Tandem duplicated genes                             | -3.749e-04        | 8.088e-03               | 0.046   | 0.963          | 0.02                         | No                     |

**Table S11.** Linear regression model including gbM and a set of orthogonal predictor variables generated by a PCR analyses including gene FPKM, total intron length, number of introns, gene length and expression breadth to predict the number of reads mapping to the introns of a gene. The loadings of each genomic feature on the orthogonal predictor variables are shown in the supplementary Fig. S5.

| Predictors | Log (intron FPKM) |                |                   |
|------------|-------------------|----------------|-------------------|
|            | Estimate          | Standard Error | <i>p</i> -value   |
| Intercept  | 2.323141          | 0.024263       | $< 2 * 10^{-16}$  |
| PC 1       | 0.001077          | 0.011511       | 0.925             |
| PC 2       | -0.959228         | 0.014663       | $< 2 * 10^{-16}$  |
| PC 3       | -1.303276         | 0.016856       | $< 2 * 10^{-16}$  |
| PC 4       | 1.198321          | 0.031490       | $< 2 * 10^{-16}$  |
| PC 5       | -0.294199         | 0.036532       | $1.03 * 10^{-16}$ |
| gbM        | -0.133017         | 0.039130       | $6.81 * 10^{-04}$ |

**Table S12.** Model averaged ANCOVA of log (intron FPKM) using only genes identified as gbM or unmethylated in the two independent studies, Bewick et al. 2016 and Seymour et al. 2014 ( $R^2=0.726$ ;  $n=3\ 958$ ). Genomic features which were kept in the best model generated by a BIC model averaging model selection are indicated in the last column.

| Genomic features                                    | Log (intron FPKM) |                         |         |                |                              |                        |
|-----------------------------------------------------|-------------------|-------------------------|---------|----------------|------------------------------|------------------------|
|                                                     | Coefficients      | Adjusted Standard error | Z value | Pr(> z )       | Relative variable importance | Included in best model |
| Log (gene FPKM)                                     | 1.5734218         | 0.0168737               | 93.247  | $< 2*10^{-16}$ | 1.00                         | Yes                    |
| Log (gene length)                                   | -0.8402360        | 0.0318756               | 26.360  | $< 2*10^{-16}$ | 1.00                         | Yes                    |
| Log (total intron length)                           | 0.4789313         | 0.0311087               | 15.395  | $< 2*10^{-16}$ | 1.00                         | Yes                    |
| Log (intron number)                                 | 0.8957627         | 0.0308620               | 29.025  | $< 2*10^{-16}$ | 1.00                         | Yes                    |
| gbM                                                 | -0.1538826        | 0.0536911               | 2.866   | 0.00416        | 0.95                         | Yes                    |
| Lethal gene                                         | 0.0007564         | 0.0079670               | 0.095   | 0.92436        | 0.02                         | No                     |
| A. lyrata homolog Ka/Ks                             | 0.0004346         | 0.0037858               | 0.115   | 0.90860        | 0.03                         | No                     |
| Co-expression module size                           | 0.0006164         | 0.0046021               | 0.134   | 0.89345        | 0.03                         | No                     |
| Expression breadth                                  | -0.0828208        | 0.0169416               | 4.889   | $1*10^{-6}$    | 1.00                         | Yes                    |
| Gene duplicates retained from the $\alpha$ WGD      | -0.0005220        | 0.0062212               | 0.084   | 0.93313        | 0.02                         | No                     |
| Gene duplicates retained from the $\beta\gamma$ WGD | 0.0000738         | 0.0062544               | 0.012   | 0.99058        | 0.02                         | No                     |
| Tandem duplicated genes                             | -0.0008410        | 0.0105740               | 0.080   | 0.93661        | 0.02                         | No                     |

**Table S13.** Best model to predict gbM based on a BIC model selection.

| Predictors                  | gbM       |                |                 |
|-----------------------------|-----------|----------------|-----------------|
|                             | Estimate  | Standard Error | <i>p</i> -value |
| Intercept                   | 0.483415  | 0.006029       | $< 2*10^{-16}$  |
| Log (total intron length)   | -0.040660 | 0.009399       | $1.55*10^{-05}$ |
| Log (gene length)           | 0.312428  | 0.009435       | $< 2*10^{-16}$  |
| Co-expression module size   | 0.073251  | 0.006234       | $< 2*10^{-16}$  |
| Expression breadth          | 0.056868  | 0.006120       | $< 2*10^{-16}$  |
| Log (mean expression level) | -0.018734 | 0.006177       | 0.00244         |

## Supplementary Figures

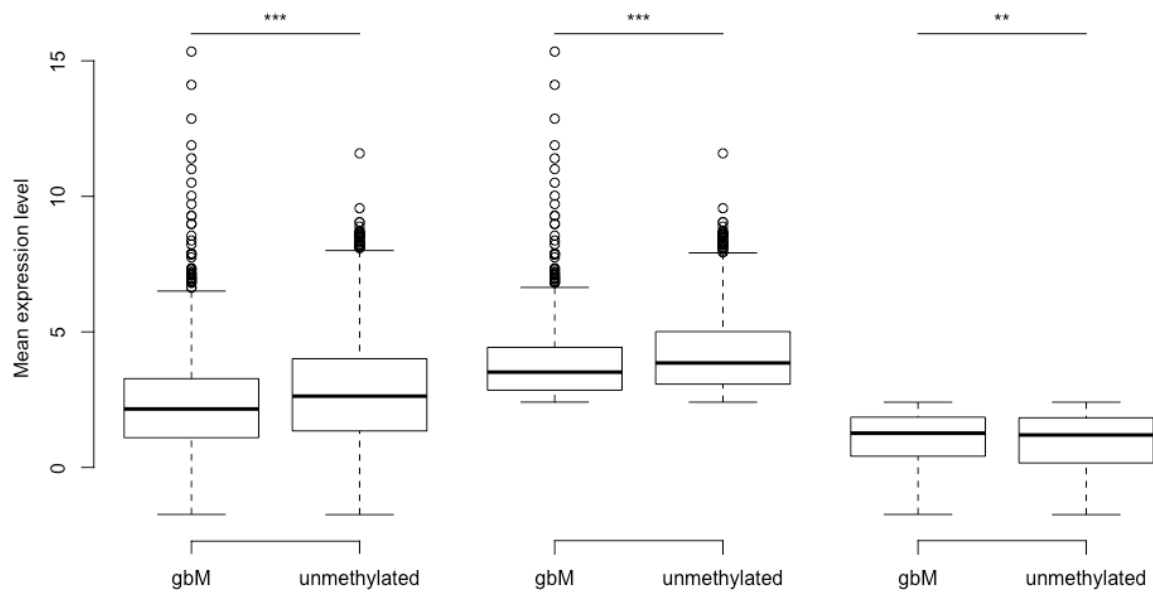

**Figure S1.** Differences in the mean expression level of gbM and unmethylated genes. On the left, the distribution of the expression level of all genes split into gbM and unmethylated genes. In the middle, the distribution of the expression level of genes with an expression level higher than the median split into gbM and unmethylated genes. On the right, the distribution of the expression level of genes with an expression level lower than the median split into gbM and unmethylated genes. Significances were based on a two-sided Mann-Whitney U-test.

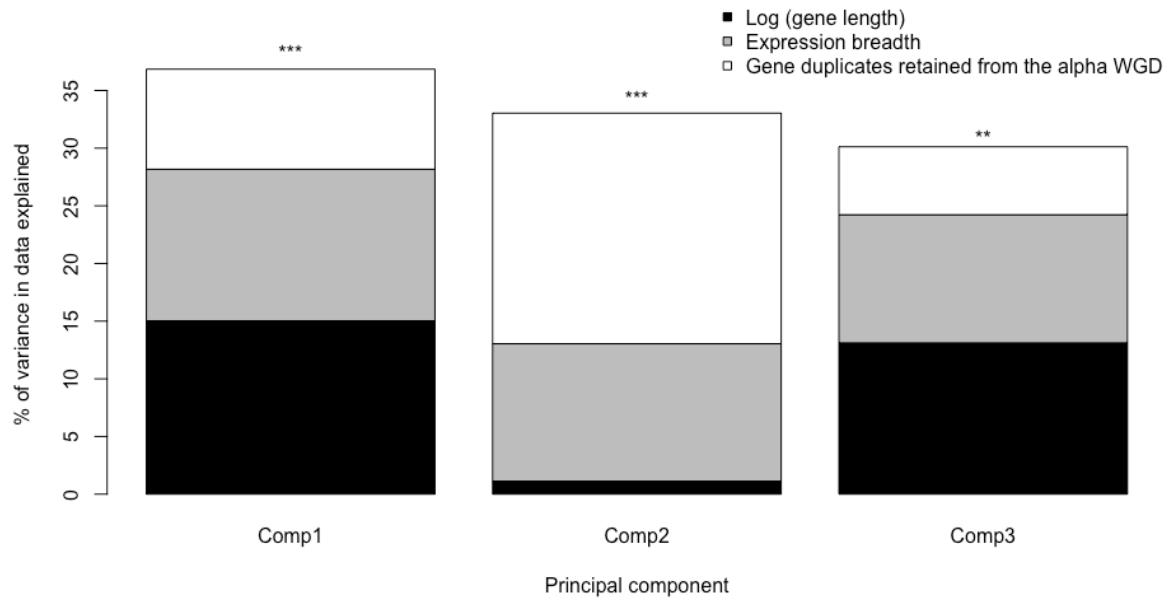

**Figure S2.** Loadings of the different genomic features on each principal component used in the linear regression analyses including gbM and this set of orthogonal predictor variables to predict  $F^*$ . Principal components which were significantly correlated with  $F^*$  are indicated with stars (\*\*:  $p$ -value < 0.01; \*\*\*:  $p$ -value < 0.001).



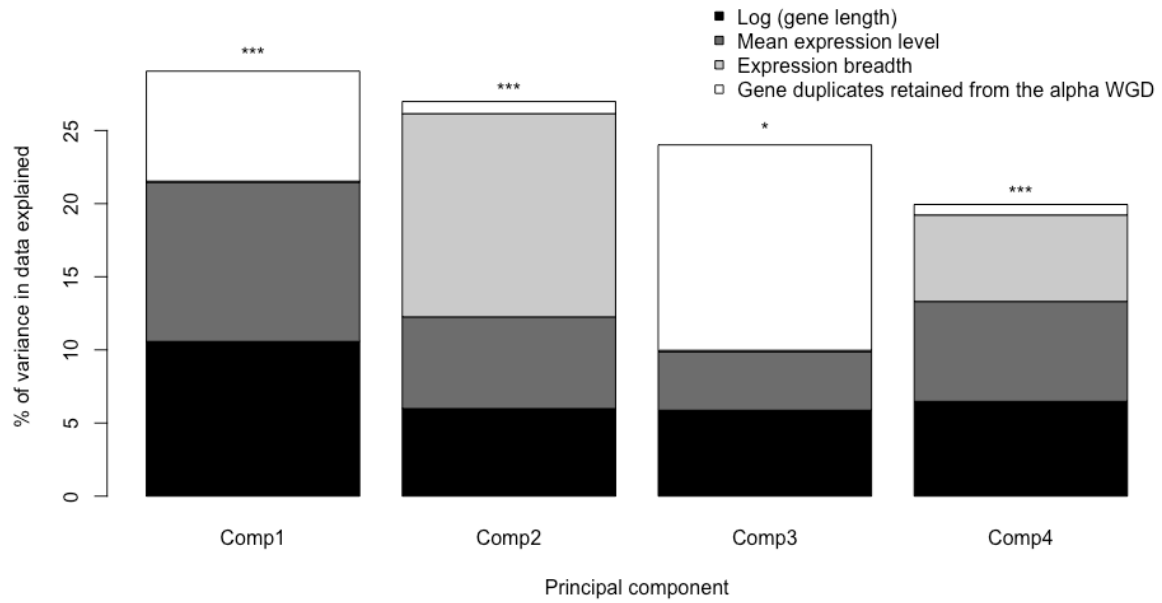

**Figure S3.** Loadings of the different genomic features on each principal component used in the linear regression analyses including gbM and this set of orthogonal predictor variables to predict  $F'$ . Principal components which were significantly correlated with  $F'$  are indicated with stars (\*:  $p$ -value < 0.05; \*\*\*:  $p$ -value < 0.001).

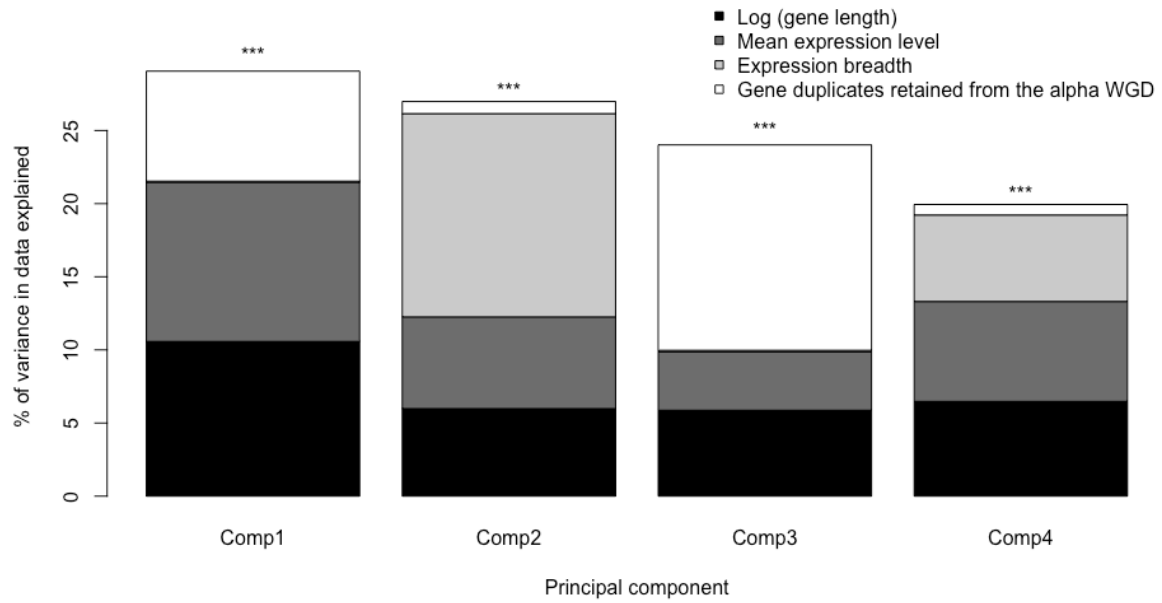

**Figure S4.** Loadings of the different genomic features on each principal component used in the linear regression analyses including gbM and this set of orthogonal predictor variables to predict gene expression consistency. Principal components which were significantly correlated with gene expression consistency are indicated with stars (\*\*\*:  $p$ -value < 0.001).

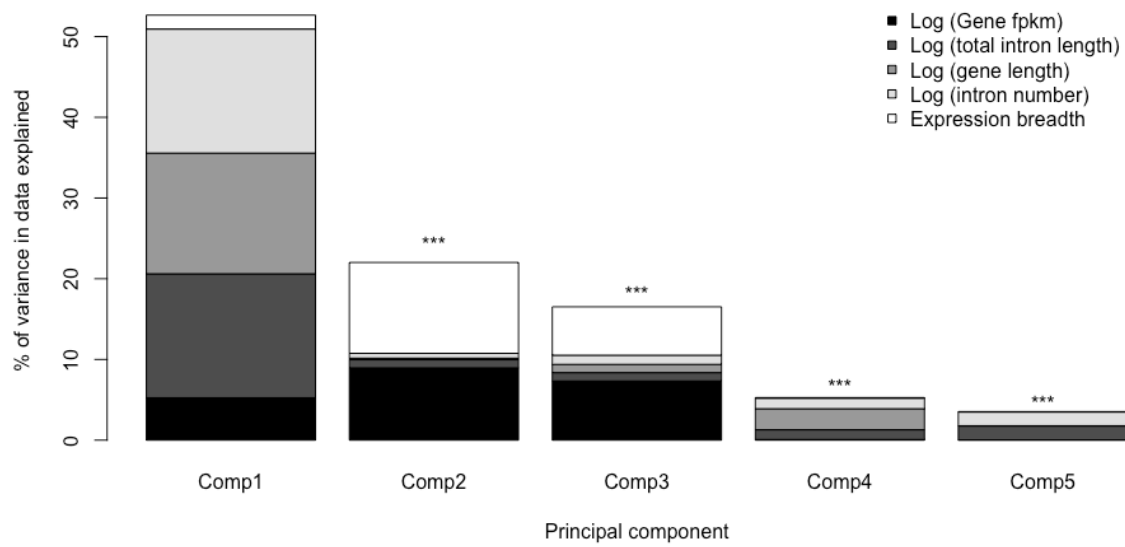

**Figure S5.** Loadings of the different genomic features on each principal component used in the linear regression analyses including gbM and this set of orthogonal predictor variables to predict the number of reads mapping to the introns of a gene. Principal components which were significantly correlated with the number of reads mapping to the introns of a gene are indicated with stars (\*\*\*:  $p$ -value < 0.001).
